# Supplementary material for: Increased rise time of electron temperature during adiabatic plasmon focusing
Source: PubMed Central journal article supplement (PMC5698320; doi:10.1038/s41467-017-01802-y), 2017-11-21
Supplement: 41467_2017_1802_MOESM2_ESM.pdf [file 41467_2017_1802_MOESM2_ESM.pdf]

## Description of Additional Supplementary Files

File Name: Supplementary Movie

Description: Movie of  $\Delta R$ -images recorded at the SU-8/Au interface with a 67-fs time step during the SPP nano-focusing. Snapshots of the movie are presented in Fig. 2.
